# Supplementary material
Source: publisher site journal article supplement (https://vertebrate-zoology.arphahub.com/article/101065/download/suppl/32/)
Supplement: Supplementary file 1

## Sheet: Ctenomys
Supplementary File 2. Table S1. Individual measurements for specimens of Ctenomys used in the morphological analysis. For collection acronyms and measuremnt abreviattions see the section of "Materials and methods".
Taxa	Catalog number	TLS	CIL	LN	NW	RW	FL	IOC	ZB	BB	MB	IFH	DL	PL	UIW	PM4L	TRL	Locality
Ctenomys bergi	CUNRC 38273	37.16	35.97	11.81	6.11	11.23	8.82	22.2	8.2	15.34	21.78	6.86	15.06	9.68	5.4	2.93	6.85	Argentina, Córdoba, Guanaco Muerto
Ctenomys bergi	CUNRC 3872	36.65	35.59	13.09	5.88	11.27	8.72	21.33	7.75	15.98	21.56	6.64	15.29	9.67	5.48	2.94	7.77	Argentina, Córdoba, Guanaco Muerto
Ctenomys bergi	CUNRC 38267	40.37	39.17	13.58	6.61	12.92	10.01	24.5	8.91	16.74	24.8	7.24	16.44	10.43	6.29	3.27	7.94	Argentina, Córdoba, Guanaco Muerto
Ctenomys bergi	CUNRC 38268	39.43	38.03	11.93	6.21	11.76	8.97	22.88	7.78	15.48	21.32	7.02	16.85	10.34	5.78	2.95	8.51	Argentina, Córdoba, Guanaco Muerto
Ctenomys bergi	CUNRC 38264	33.64	31.2	11.67	4.91	9.7	7.78	20.83	6.96	15.49	20.55	6.03	13.78	8.14	4.72	2.77	6.85	Argentina, Córdoba, Lucio V. Mansilla
Ctenomys bergi	CUNRC 38262	36.39	34.43	11.2	5.73	11.29	7.96	20.23	7.43	15.46	21.1	6.16	13.94	8.44	5.05	2.56	7.1	Argentina, Córdoba, Lucio V. Mansilla
Ctenomys bergi	CUNRC 38255	35.19	34.57	12.04	5.09	11.18	8.09	21.39	7.33	14.8	21.22	6.49	15.07	9.12	5.43	2.83	7.19	Argentina, Córdoba, San Francisco del Chañar
Ctenomys bergi	CUNRC 38253	34.85	33.63	12.1	5.6	9.48	7.85	20.87	6.76	14.67	19.93	6.47	14.55	8.81	5.03	2.79	6.96	Argentina, Córdoba, San Francisco del Chañar
Ctenomys bergi	CUNRC 38259	35.21	33.89	12.47	5.49	10.42	7.9	19.91	6.82	14.53	19.9	6.37	14.75	8.64	5.13	2.85	7.19	Argentina, Córdoba, San Francisco del Chañar
Ctenomys bergi	CUNRC 38258	33.59	32.8	11.53	5	10.72	7.62	20.8	7	14.79	20.48	6.46	13.95	8.34	5.02	2.75	7.21	Argentina, Córdoba, San Francisco del Chañar
Ctenomys bergi	CUNRC 38256	36.1	35.45	12.27	5.76	9.91	8.37	21.38	7.31	14.81	21.11	6.64	15.52	9.16	5.14	2.85	7.22	Argentina, Córdoba, San Francisco del Chañar
Ctenomys bergi	CUNRC 38257	36.56	35.25	13.11	5.44	10.58	7.91	21.68	7.74	15.7	21.53	6.52	15.83	9.43	4.98	2.97	7.35	Argentina, Córdoba, San Francisco del Chañar
Ctenomys bergi	CUNRC 38254	40.96	40.62	13.24	6.49	10.71	10.05	23.57	8.01	15.86	22.3	7.96	17.77	11.13	6.23	3	8.33	Argentina, Córdoba, San Francisco del Chañar
Ctenomys emilianus	CNP 6547*	52.58	46.4	17.6	8.71	12.88	15.84	11.49	30.81	22.72	29.08	9.75	13.02	23.51	8.71	4.6	11.51	Argentina: Mendoza, La Valenciana
Ctenomys emilianus	CMI 7701	45.74	44.31	17.49	7.32	10.83	13.01	10.02	26.99	17.18	25.79	8.84	11.45	20.09	6.82	3.68	10.14	Argentina: Mendoza, Las Loicas
Ctenomys emilianus	CNP 6555*	54.35	49.82	17.36	8.36	12.2	14.8	9.94	29.77	19.85	29.77	10.45	15.9	21.72	7.5	4.25	10.99	Argentina: Mendoza, RP226, 9 km ENE Las Loicas
Ctenomys fochi	CFA-MA 12118	40.67	40.12	13.71	6.16	9.5	11.44	8.21	23.94	16.26	23.33	7.89	10.53	17.32	5.95	3.05	8.32	Argentina: Catamarca, Chumbicha
Ctenomys fochi	CFA-MA 12120	39.11	38.39	12.61	6.99	8.8	12.15	7.75	23.78	15.96	24	7.48	9.51	16.51	5.58	3.32	8.72	Argentina: Catamarca, Chumbicha
Ctenomys fulvus	UACH 546	48.64	45.93	16.85	7.47	11.34	14.61	9.94	29.98	18.73	29.12	9.63	12.7	21.27	7.3	4.29	10.32	Chile: Antofagasta, Vegas de Turi
Ctenomys fulvus	UACH 547	50.09	48.01	17.22	7.03	11.38	13.51	10.33	30.19	19.94	29.43	9.82	12.53	21.55	7.49	4.47	11.56	Chile: Antofagasta, Vegas de Turi
Ctenomys fulvus	UACH 556	50.17	46.84	16.63	7.47	11.04	15.14	10.02	29.94	19.75	28.92	9.55	12.77	20.98	7.52	4.06	10.76	Chile: Antofagasta, Vegas de Turi
Ctenomys fulvus	UACH 558	50.04	47.49	16.97	7.18	11.49	13.94	9.85	30.58	19.99	29.73	9.87	12.42	21.34	7.33	4.07	11.18	Chile: Antofagasta, Vegas de Turi
Ctenomys fulvus	UACH 559	58.19	55.69	20.73	8.61	14.44	14.17	12.26	35.83	20.82	32.3	12.17	16.8	26.71	9.61	4.71	12.82	Chile: Antofagasta, Vegas de Turi
Ctenomys fulvus	UACH 308	56.99	53.42	19.57	9.49	14.33	15.64	11.97	35.56	20.66	36.34	12.29	15.54	24.14	9.7	4.43	11.04	Chile: El Loa, San Pedro de Atacama
Ctenomys fulvus	UACH 309	57.18	54.15	19.17	9.18	13.63	16.42	11.97	33.82	21.08	32.32	11.34	14.86	24.25	8.99	4.28	12.12	Chile: El Loa, San Pedro de Atacama
Ctenomys fulvus	UACH 313	58.03	54.3	19.47	9.49	13.6	15.09	11.51	34.45	22.44	34.73	12.03	14.91	23.38	8.71	4.36	11.52	Chile: El Loa, San Pedro de Atacama
Ctenomys fulvus	UACH 539	54.22	50.38	18.68	9.45	13.44	15.85	11.63	31.77	20.08	31.3	10.96	14.77	23.5	8.78	4.18	11.49	Chile: El Loa, San Pedro de Atacama
Ctenomys fulvus	UACH 540	56.48	52.07	20	9.44	14.08	15.47	11.58	35.7	21.89	34.61	11.12	15.31	24.09	8.62	4.25	11.66	Chile: El Loa, San Pedro de Atacama
Ctenomys fulvus	UACH 564	53.05	49.98	17.65	8.93	12.71	15.02	11.3	31.78	20.36	32.17	11.46	13.62	22.22	8.05	4.18	11.79	Chile: El Loa, San Pedro de Atacama
Ctenomys fulvus	UACH 565	54.4	50.95	17.68	8.8	12.7	16.32	11.41	32.19	20.23	31.55	11.41	14.17	22.57	8.34	4.07	11.38	Chile: El Loa, San Pedro de Atacama
Ctenomys fulvus	UACH 565	58.06	54.49	19.18	9.73	13.75	16.41	11.93	33.97	20.52	32.03	11.55	14.83	24.81	8.99	4.22	12.39	Chile: El Loa, San Pedro de Atacama
Ctenomys fulvus	UACH 567	55.6	52.21	18.74	8.97	13.55	13.11	11.79	33.5	20.84	31.95	11.61	14.4	24.02	9.02	4.24	12.04	Chile: El Loa, San Pedro de Atacama
Ctenomys fulvus	UACH 568	52.26	48.83	17.33	8.88	12.37	15.35	10.68	32.03	20.12	30.87	10.41	13.1	21.5	7.87	4.39	11.5	Chile: El Loa, San Pedro de Atacama
Ctenomys fulvus	UACH 570	55.3	51.53	19.05	8.91	13.8	14.75	11.79	34.83	20.4	34.77	11.27	14.2	23.11	8.45	4.18	11.5	Chile: El Loa, San Pedro de Atacama
Ctenomys fulvus	UACH 571	49.53	47.87	16.62	8.63	11.71	14.87	10.87	30.36	21.89	31.13	10.1	12.16	20.68	7.22	3.83	10.88	Chile: El Loa, San Pedro de Atacama
Ctenomys fulvus	UACH 305	56.27	52.51	19.04	9.94	13.72	16.06	12.44	33.95	20.92	32.22	12.13	15.05	20.32	9.26	4.33	11.78	Chile: El Loa, San Pedro de Atacama, Cúcuter
Ctenomys fulvus	UACH 307	54.2	50.2	16.79	9.31	13.22	15.21	11.35	32.31	20.34	32.12	11.56	14.48	22.87	8.47	4.05	11.08	Chile: El Loa, San Pedro de Atacama, Cúcuter
Ctenomys fulvus	UACH 315	47.09	43.6	15.84	7.77	10.43	13.34	9.94	28.64	20.08	29.23	9.6	12.14	19.32	6.99	3.63	10.02	Chile: El Loa, San Pedro de Atacama, salar
Ctenomys fulvus	UACH 318	52.89	49.62	17.79	8.73	11.78	14.3	10.34	30.57	20.04	29.87	10.92	14.12	22.93	8.24	4.1	11.37	Chile: El Loa, San Pedro de Atacama, salar
Ctenomys fulvus	UACH 320	51.44	47.94	17.11	8.52	12.05	12.29	10.7	29.61	20.68	31.88	11.23	13.04	20.39	7.82	3.99	11.23	Chile: El Loa, San Pedro de Atacama, salar
Ctenomys fulvus	UACH 320	50.74	47.43	17.64	7.71	11.28	14.9	10.48	30.18	19.79	30.55	10.05	13.17	20.99	7.95	4.05	10.23	Chile: El Loa, San Pedro de Atacama, salar
Ctenomys fulvus	UACH 321	53.7	50.35	18.28	9.61	13.65	15.27	11.31	32.51	21.31	32.27	11.2	13.91	22.31	8.21	3.98	11.32	Chile: El Loa, San Pedro de Atacama, salar
Ctenomys fulvus	UACH 1464	60.35	56.4	20.75	10.78	15.86	15.54	14.06	39.7	22.46	37.67	12.98	15.99	25.82	10.45	4.33	11.6	Chile: Iquique, Colchane, La Huayca
Ctenomys fulvus	UACH 1465	54.32	51.99	19.77	8.5	13.93	14.5	11.43	34.18	19.66	34.7	11.97	14.65	23.09	9.19	4.39	11.14	Chile: Iquique, Colchane, La Huayca
Ctenomys fulvus	UACH 2413	61.51	57.46	20.99	10.55	15.65	16.33	14.06	38.74	22.05	37.67	12.11	16.71	26.52	10.44	4.52	11.26	Chile: Iquique, Colchane, La Huayca
Ctenomys fulvus	UACH 2414	54.35	50.81	19.74	8.59	12.92	13.37	11.67	34.36	19.7	34.24	10.93	14.46	22.91	8.36	4.25	10.71	Chile: Iquique, Colchane, La Huayca
Ctenomys fulvus	UACH 312	55.41	52.25	19.18	9.61	13.48	14.93	12.37	33.42	20.78	32.68	11.79	14.85	23.79	8.8	4.23	12.14	Chile: Iquique, Colchane, La Huayca
Ctenomys fulvus	UACH 314	59.78	55.77	21.24	10.11	15.8	14.26	14.33	37.23	21.94	37.06	12.7	15.95	25.51	10.28	4.55	11.81	Chile: Iquique, Colchane, La Huayca
Ctenomys fulvus	UACH 3796	52.94	50.46	17.63	8.55	12.33	14.67	11.06	31.83	20.6	31.26	10.86	13.49	22.51	8.22	4.29	12.5	Chile: Iquique, Colchane, La Huayca
Ctenomys fulvus	UACH 3797	54.06	51.25	18.85	8.74	13.54	13.7	11.85	33.95	20.81	33.68	11.03	14.29	23	8.34	4.42	10.98	Chile: Iquique, Colchane, La Huayca
Ctenomys fulvus	UACH 3798	50.76	48.4	16.7	8.4	12.15	14.48	11.19	31.61	20.63	31	10.22	12.65	21.18	8	4.15	11.13	Chile: Iquique, Colchane, La Huayca
Ctenomys fulvus	UACH 4440	56.01	52.18	21.38	9.19	13.37	14.19	11.64	36.33	20.51	34.6	12.37	15.33	24.54	8.69	4.35	10.91	Chile: Iquique, Colchane, La Huayca
Ctenomys fulvus	UACH 4441	54.42	49.9	19.68	9.02	13.31	14.12	11.83	34.88	20.79	34.86	11.31	14.57	22.52	8.78	4.2	11.39	Chile: Iquique, Colchane, La Huayca
Ctenomys fulvus	UACH 4442	55.19	51.46	18.78	9.15	13.12	12.81	11.71	34.8	20.17	33.59	11.66	14.73	23.69	8.47	4.18	11.2951	Chile: Iquique, Colchane, La Huayca
Ctenomys fulvus	UACH 4443	56.08	53	20.73	8.75	13.74	13.91	11.82	35.91	21.25	35.12	11.85	15.22	24	8.83	4.36	10.96	Chile: Iquique, Colchane, La Huayca
Ctenomys fulvus	UACH 4444	58.64	54.84	20.84	10.15	14.55	13.18	13.71	36.93	21.98	36.05	11.97	16.23	25.24	9.63	4.25	11.95	Chile: Iquique, Colchane, La Huayca
Ctenomys fulvus	UACH 542	52.92	49.77	18.72	9.1	12.5	15.95	11.9	32.12	20.5	31.36	11.06	13.98	22.28	8.06	4.09	11.11	Chile: Iquique, Colchane, La Huayca
Ctenomys fulvus	UACH 543	60.14	57.56	21.4	10.74	15.83	15.35	14.3	39.47	21.95	36.36	13.05	17.25	26.35	10.49	4.54	12.34	Chile: Iquique, Colchane, La Huayca
Ctenomys fulvus	UACH 545	55.95	51.84	18.27	8.93	13.86	13.84	12.73	34.63	20.97	34.03	11.26	13.76	22.75	8.69	4.48	11.69	Chile: Iquique, Colchane, La Huayca
Ctenomys fulvus	UACH 552	56.42	52.07	18.94	9.67	14.07	14.64	11.4	34.31	20.13	33.99	11.85	14.82	23.79	8.79	4.62	11.49	Chile: Iquique, Colchane, La Huayca
Ctenomys fulvus	UACH 555	55.4	52.98	20.52	9.25	14.58	14.11	12.27	35.48	20.92	34.51	11.94	14.79	24.44	9.12	4.36	11.63	Chile: Iquique, Colchane, La Huayca
Ctenomys fulvus	UACH 557	59.98	57.25	20.75	9.85	15.03	15.41	13.78	38.92	20.87	36.52	12.93	15.99	26.07	9.9	4.5	11.59	Chile: Iquique, Colchane, La Huayca
Ctenomys fulvus	UACH 561	56.81	53.35	19.91	9.64	14.92	15.92	12.53	34.59	20.79	33.6	11.78	14.8	24.27	9.71	4.28	12	Chile: Iquique, Colchane, La Huayca
Ctenomys fulvus	UACH 569	58.72	55.45	20.58	8.97	14.41	15.15	12.4	36.61	21.44	36.46	12.2	15.32	24.38	9.05	4.57	11.61	Chile: Iquique, Colchane, La Huayca
Ctenomys fulvus	UACH 572	55.6	51.22	17.64	9.03	13.28	14.09	11.22	34.62	20.11	30.5492	11.189	14.93	23.92	8.42	4.17	11.23	Chile: Iquique, Colchane, La Huayca
Ctenomys johannis	CFA-MA 12452	45.29	44.11	15.33	6	9.49	12.86	8.25	26.93	18.19	25.75	8.57	12.11	19.37	6.5	3.17	8.97	Argentina: San Juan, Cañada Honda
Ctenomys maulinus	CMI 7702	52.11	49.42	19.31	7.73	11.47	15.4	9.41	27.48	16.68	28.84	10.11	14.78	22.85	7.69	4.02	11.4	Argentina: Mendoza, Los Azufres
Ctenomys maulinus	CMI 7706	45.51	44.41	18.26	6.98	10.46	12.94	9.27	26.07	17.24	22.02	9.74	12.62	20.19	6.87	3.71	10.26	Argentina: Mendoza, Los Azufres
Ctenomys maulinus	CMI 3798	44.53	42.35	15.57	6.52	10.03	12.18	8.63	26.18	17.49	23.33	9.16	12.21	19.33	6.89	3.72	9.54	Argentina: Neuquén, Chapelco
Ctenomys maulinus	CMI 3799	41.63	39.45	14.76	5.77	8.97	13.02	7.87	23.22	16.01	21.43	8.07	10.9	18.16	6.03	3.52	8.94	Argentina: Neuquén, Chapelco
Ctenomys maulinus	CMI 3800	43.54	41.69	15.1	5.96	9.86	13	8.31	24.93	16.43	22.52	8.73	12.12	19.29	6.42	3.65	9	Argentina: Neuquén, Chapelco
Ctenomys maulinus	CMI 3801	46.4	44.73	16.7	6.98	10.33	12.2	8.18	26.22	16.87	24.16	9.7	13.23	21.39	7.21	3.72	10.23	Argentina: Neuquén, Chapelco
Ctenomys maulinus	CMI 3802	45.31	43.55	15.4	6.61	9.44	12.57	8.9	25.36	17.67	23.67	9.07	12.6	19.98	6.23	3.59	9.54	Argentina: Neuquén, Chapelco
Ctenomys maulinus	UACH 1645	53.4	51.67	18.84	8.44	12.08	12.78	9.74	29.68	17.67	24.77	10.12	15.83	24.48	7.99	4.26	10.88	Chile: Petronquines, Laguna Laja
Ctenomys mendocinus	CMI 2650	41.35	39.57	14.92	6.16	9.49	13.27	7.78	24.24	16.34	23.4	7.53	11.14	17.81	6.05	3.42	8.74	Argenina: Mendoza, Godoy Cruz, San Ignacio
Ctenomys mendocinus	CMI 2658	41.59	39.87	14.28	6.17	8.9	12.39	8.13	25.49	16.94	22.83	7.81	10.66	17.13	6.11	3.42	8.98	Argenina: Mendoza, Godoy Cruz, San Ignacio
Ctenomys mendocinus	CFA-MA 11252	46.32	45.73	15.11	6.75	11.3	12.44	8.27	27.59	16.85	25.73	9.07	11.82	20.37	7.05	3.57	9.57	Argentina: Córdoba, Río V
Ctenomys mendocinus	CFA-MA 11263	41.47	40.2	12.98	5.73	9.06	11.98	8.05	23.57	16.4	24.63	7.63	10.76	18.55	6.19	3.13	9.02	Argentina: Córdoba, Río V
Ctenomys mendocinus	CFA-MA 11266	42.03	40.59	13.92	6.18	9.93	12.05	7.96	24.67	17.76	24.75	7.81	10.42	18.35	6.29	3.63	9.11	Argentina: Córdoba, Río V
Ctenomys mendocinus	CFA-MA 11271	41.93	41.01	13.83	6.35	10.39	12.28	8.24	24.01	16.59	25.1	7.52	10.65	17.8	6.49	3.28	8.8	Argentina: Córdoba, Río V
Ctenomys mendocinus	CFA-MA 11276	41.65	41.03	14.23	5.96	9.36	11.58	7.82	23.69	16.3	24.38	7.67	10.78	18.87	6.41	3.45	8.88	Argentina: Córdoba, Río V
Ctenomys mendocinus	CFA-MA 11277	45.88	44.05	14.5	6.05	11.06	12.42	8.07	26.1	16.88	25.52	8.28	12.03	20.22	7.43	3.66	9.78	Argentina: Córdoba, Río V
Ctenomys mendocinus	CFA-MA 11281	47.33	45.74	16.92	6.4	10.72	11.05	8.72	27.42	17.83	26.61	8.55	12.94	20.67	6.5	3.33	8.68	Argentina: Córdoba, Río V
Ctenomys mendocinus	CFA-MA 11282	41.44	39.6	13.54	6.04	9.86	10.1	7.62	23.12	16.04	23.63	7.46	7.49	18	6.43	3.4	8.74	Argentina: Córdoba, Río V
Ctenomys mendocinus	CFA-MA 11285	44.08	41.68	14.23	6.47	10.43	12.51	8.27	24.7	17.05	24.77	7.68	11.33	18.54	6.67	3.25	8.25	Argentina: Córdoba, Río V
Ctenomys mendocinus	CFA-MA 11286	39.4	38.42	12.62	5.98	9.31	12.44	8.17	23.27	15.61	22.7	7.35	10	17.19	6.27	3.25	8.81	Argentina: Córdoba, Río V
Ctenomys mendocinus	CFA-MA 11287	41.19	42.2	13.77	6.06	9.53	12.07	7.84	23.84	16.54	24.45	7.29	9.57	17.5	5.94	3.29	8.6	Argentina: Córdoba, Río V
Ctenomys mendocinus	CFA-MA 11290	39.33	38.43	13.9	5.59	9.26	11.15	8.08	22.17	15.75	23.34	6.68	9.45	17.3	5.98	3.33	8.6	Argentina: Córdoba, Río V
Ctenomys mendocinus	CFA-MA 11292	44.67	42.83	14.81	6.06	10.84	11.9	7.9	25.2	17.39	26.63	7.65	11.7	19.06	6.67	3.51	9.1	Argentina: Córdoba, Río V
Ctenomys mendocinus	CMI 2806	47.44	46.42	15.65	7.44	10.75	12.74	9.12	27.14	18.64	25.8	8.09	12.97	20.44	7.28	3.14154	9.14	Argentina: Mendoza, Cerro de la Gloria
Ctenomys mendocinus	CMI 7223	39.07	37.42	12.45	5.71	8.71	13.54	8.15	23.42	17.72	23.44	7.38	9.41	16.53	5.74	3.35	8.44	Argentina: Mendoza, Cerro de la Gloria
Ctenomys mendocinus	CMI 2664	40.73	38.73	12.91	5.87	9.27	13.33	7.79	24.2	16.53	24.02	7.55	10.06	17.24	5.65	3.36	9.04	Argentina: Mendoza, Godoy Cruz, San Ignacio
Ctenomys mendocinus	CMI 2804	37.57	36.74	13.21	5.81	8.19	12.23	8.25	22.23	16.33	22.29	7.39	9.34	15.69	5.3	3.35	8.6	Argentina: Mendoza, Lujan, Chacras de Coria
Ctenomys mendocinus	CMI 2806	41.11	39.81	13.64	6.48	9.18	12.83	7.86	24.09	16.63	20.04	7.44	10.27	17.34	5.61	3.28	9.19	Argentina: Mendoza, Lujan, Chacras de Coria
Ctenomys mendocinus	CMI 2519	40.35	39.73	13.02	5.94	8.9	13.95	8.45	24.58	16.83	23.89	7.63	10.42	17.21	5.61	3.46	8.16	Argentina: Mendoza, Luján, La Puntilla
Ctenomys mendocinus	CMI 2786	41.26	40.51	14.8	5.76	9.43	11.75	7.88	24.22	16.77	23.41	7.96	11.16	17.59	6	3.27	9.19	Argentina: Mendoza, Luján, La Puntilla
Ctenomys mendocinus	CMI 2810	40.96	39.32	13.12	6.32	8.67	12.3	7.83	23.82	17.35	23.15	7.22	10.6	17.36	5.57	3.22	8.35	Argentina: Mendoza, Luján, La Puntilla
Ctenomys mendocinus	CMI 2812	38.57	37.52	13.5	5.25	9.09	11.32	7.67	22.46	22.33	21.85	7.18	9.93	16.14	5.54	3.05	8.16	Argentina: Mendoza, Luján, La Puntilla
Ctenomys mendocinus	CMI 2777	40.94	38.96	12.76	5.97	8.95	13.54	8	24.69	17.53	24.07	7.55	10.37	17.2	5.82	3.18	8.55	Argentina: Mendoza, Luján, Puesto Jarilla
Ctenomys mendocinus	CMI 2489	37.59	36.52	12.55	5.86	8.68	11.59	6.89	22.45	16.56	22.73	6.81	8.95	15.44	5.31	3	8.14	Argentina: Mendoza, Santa Rosa, Ñacuñan
Ctenomys mendocinus	CMI 2510	39	37.7	12.12	6.05	8.26	12.45	7.68	22.31	16	23.33	6.5	9.43	15.96	5.38	3.11	8.03	Argentina: Mendoza, Santa Rosa, Ñacuñan
Ctenomys mendocinus	CMI 2512	37.37	36.18	12.19	5.29	8.44	11.3	7.7	22.82	16.18	23.39	7.02	8.94	15.34	5.18	2.85	7.75	Argentina: Mendoza, Santa Rosa, Ñacuñan
Ctenomys mendocinus	CMI 2513	39.44	38.44	13	5.95	8.25	10.76	7.11	22.2	16.38	22.63	7.2	9.89	16.94	5.4	3.34	8.48	Argentina: Mendoza, Santa Rosa, Ñacuñan
Ctenomys mendocinus	CMI 2514	37.1	36.11	11.74	5.15	7.91	12.16	7.02	21.11	15.16	23.11	6.41	9.1	15.2	5.19	3.19	7.61	Argentina: Mendoza, Santa Rosa, Ñacuñan
Ctenomys mendocinus	CMI 2515	41.7	39.34	14.68	5.73	9.32	12.26	8.79	23.95	16.64	23.57	7.16	10.87	16.98	5.87	3.27	8.57	Argentina: Mendoza, Santa Rosa, Ñacuñan
Ctenomys mendocinus	CMI 2646	39.15	38.16	13.07	5.28	8.55	12.09	7.04	23.31	15.75	22.52	7.4	9.9	15.96	5.27	2.99	8.26	Argentina: Mendoza, Santa Rosa, Ñacuñan
Ctenomys mendocinus	CMI 2817	39.11	38.38	13.04	6.11	8.35	11.34	7.52	22.51	15.18	22.11	6.53	10.12	16.96	5.44	3.19	7.93	Argentina: Mendoza, Santa Rosa, Ñacuñan
Ctenomys eileenae n. sp.	CFA-MA 12410	45.48	44.48	15.95	6.68	10.74	13.59	8.42	26.13	17.81	26.23	8.45	12.04	18.45	6.67	3.38	8.77	Argentina: La Rioja, Vinchina, Laguna Brava
Ctenomys eileenae n. sp.	CFA-MA 12411	43.55	41.92	14.76	6.51	10.69	13.6	9.15	26	17.91	26.22	7.95	10.65	17.16	6.17	3.22	8.41	Argentina: La Rioja, Vinchina, Laguna Brava
Ctenomys eileenae n. sp.	CFA-MA 12412	41.73	40.08	14.4	5.86	9.25	12.51	8.41	25.12	17.89	24.95	7.78	10.33	17.24	5.61	3.28	8.25	Argentina: La Rioja, Vinchina, Laguna Brava
Ctenomys eileenae n. sp.	MACN-Ma	50.6	47.21	16.92	7.21	11.47	15.29	9.81	29.88	19.69	29.12	9.17	12.16	21.05	7.43	3.81	10.23	Argentina: La Rioja, Vinchina, Refugio El Peñón, on road to Laguna Brava, 3609 m
Ctenomys eileenae n. sp.	MACN-Ma	49.68	48.17	17.04	7.86	12.03	14.21	10	29.9	19.4	29.41	9.92	12.62	21.68	7.65	3.67	10.44	Argentina: La Rioja, Vinchina, Refugio El Peñón, on road to Laguna Brava, 3609 m
Ctenomys eileenae n. sp.	MACN-Ma	43.81	41.75	15.75	7.11	10.49	13.28	9.05	26.35	18.16	26.44	8.49	10.89	18.14	6.73	3.47	9.08	Argentina: La Rioja, Vinchina, Refugio El Peñón, on road to Laguna Brava, 3609 m
Ctenomys eileenae n. sp.	MACN-Ma	48.35	47.14	16.39	7.89	11.61	15.35	10	29.22	18.42	28.85	9.4	12.57	20.17	7.22	3.68	10.18	Argentina: La Rioja, Vinchina, Refugio El Peñón, on road to Laguna Brava, 3609 m
Ctenomys eileenae n. sp.	MACN-Ma 18820	44.6	42.96	15.84	7.06	10.09	13.01	9.19	26.28	18.47	26.42	8.58	11.44	17.78	6.32	3.28	8.83	Argentina: San Juan, Parque Nacional San Guillermo, Cerro Agua del Indio
Ctenomys eileenae n. sp.	MACN-Ma 18821	44.33	42.46	16.55	6.61	9.56	12.99	8.16	25.36	18.31	25.19	8.07	11	17.65	6.46	3.32	9.66	Argentina: San Juan, Parque Nacional San Guillermo, Cerro Agua del Indio
Ctenomys eileenae n. sp.	MACN-Ma 18823	47.12	44.65	16.73	7.27	11.12	13.62	9.29	27.65	19.33	26.96	8.76	12.34	19.18	6.83	3.19	9.06	Argentina: San Juan, Parque Nacional San Guillermo, Cerro Agua del Indio
Ctenomys eileenae n. sp.	MACN-Ma 18817	43.44	42.31	15.18	6.84	9.6	13.14	8.47	25.48	17.97	25.77	7.96	10.96	17.55	6	3.25	8.5	Argentina: San Juan, Parque Nacional San Guillermo, Cerro Imán
Ctenomys eileenae n. sp.	MACN-Ma 18819	43.9	42.38	16.44	6.96	9.66	12.64	8.67	25.76	17.81	25.43	8.42	10.86	17.45	6.3	3.29	8.52	Argentina: San Juan, Parque Nacional San Guillermo, Cerro Imán
Ctenomys eileenae n. sp.	MACN-Ma 18828	44.64	43	16.12	7.3	10.3	13	9.4	26.5	18.47	26.45	8.57	11.47	17.83	6.4	3.26	8.8	Argentina: San Juan, Parque Nacional San Guillermo, Cerro Imán
Ctenomys eileenae n. sp.	MACN-Ma 18816	48.43	46.65	17.74	7.8	11.4	12.94	9.54	28.14	18.81	27.71	9.34	12.3	19.97	7.22	3.59	9.77	Argentina: San Juan, Parque Nacional San Guillermo, Los Caserones
Ctenomys eileenae n. sp.	MACN-Ma 18818	47.85	46.32	16.74	7.33	11.48	13.61	9.21	27.22	17.66	27.16	9.26	11.95	19.47	7.13	3.26	9.96	Argentina: San Juan, Parque Nacional San Guillermo, Los Caserones
Ctenomys eileenae n. sp.	MACN-Ma 18824	49.75	47.82	16.56	7.75	12	13.74	9.4	29.35	19.06	28.06	9.87	12.17	20.08	7.87	3.57	9.53	Argentina: San Juan, Parque Nacional San Guillermo, Mina La Brea
Ctenomys eileenae n. sp.	MACN-Ma 18813	46.73	45.38	16.2	7.31	10.51	13.07	9.55	27.81	18.78	26.93	8.22	11.64	19.14	6.77	3.47	8.92	Argentina: San Juan, Parque Nacional San Guillermo, Puesto Agua del Godo
Ctenomys eileenae n. sp.	MACN-Ma 18814	43.02	40.73	14.02	6.87	9.52	13.2	9.01	26.51	19.45	26.68	8.02	10.56	17.16	5.85	3.42	8.69	Argentina: San Juan, Parque Nacional San Guillermo, Puesto Agua del Godo
Ctenomys eileenae n. sp.	MACN-Ma 18815	52.48	51.19	19.61	7.98	12.51	13.64	10.12	30.2	19.32	28.77	9.52	13.61	22.19	8.3	3.53	10.28	Argentina: San Juan, Parque Nacional San Guillermo, Puesto Agua del Godo
Ctenomys eileenae n. sp.	MACN-Ma 18825	46.52	44.39	15.85	6.73	10.23	13.02	8.05	26.15	18.26	25.51	7.9	11.33	18.86	6.41	3.4	9.65	Argentina: San Juan, Parque Nacional San Guillermo, Refugio del Macho Muerto
Ctenomys eileenae n. sp.	MACN-Ma 18826	45	43.61	16.44	6.97	9.7	13.13	9.1	25.72	18.25	25.57	8.6	11	18.32	6.74	3.49	9.3	Argentina: San Juan, Parque Nacional San Guillermo, Rincón del Río
Ctenomys eileenae n. sp.	MACN-Ma 18827	44.19	42.93	15.12	6.53	9.89	13.33	8.53	25.88	18.37	28.43	8.17	11.1	18.06	6.36	3.38	9.04	Argentina: San Juan, Parque Nacional San Guillermo, Rincón del Río
Ctenomys eileenae n. sp.	MACN-Ma 18822	53.96	51.69	18.8	8.39	12.28	12.91	8.93	29.66	18.67	29.51	10.67	14.29	22.7	7.64	3.86	10.05	Argentina: San Juan, Parque Nacional San Guillermo, Vega del Infiernillo
Ctenomys verzi n. sp.	CMI 7703	43.58	40.68	15.2	7.65	10.26	12.31	8.42	25.04	17.76	23.36	8.33	10.98	18.2	6.58	3.67	8.82	Argentina: Mendoza, Malargue, 10 km by road NW Las Leñas, 2799 m
*Measurements recorded from the photographs published by Tammone et al. (2021) using the TPSdig2 digitization software (Rohlf, 2013; tpsDIG2: available at: <http://life.bio.sunysb.edu/morph/soft-dataacq.html>).
